# Supplementary material for: Cyclones enhance the transport of sea salt aerosols to the high atmosphere in the Southern Ocean
Source: Copernicus journal article supplement (doi:10.5194/egusphere-2023-896), 2023-06-15
Supplement: Supplementary file 1 [file egusphere-2023-896-supplement.pdf]

# **Cyclones enhance the transport of sea salt aerosols to the high atmosphere in the Southern Ocean**

Jun Shi<sup>1,2</sup>, Jinpei Yan<sup>\*1,2</sup>, Shanshan Wang<sup>1,2</sup>, Shuhui Zhao<sup>3</sup>, Miming Zhang<sup>1,2</sup>, Suqing Xu<sup>1,2</sup>, Qi Lin<sup>1,2</sup>, Hang Yang<sup>1,2</sup>, Siying Dai<sup>1,2</sup>

<sup>1</sup>Key Laboratory of Global Change and Marine Atmospheric Chemistry, Ministry of Natural Resources, Xiamen 361005, China;

<sup>2</sup>Third Institute of Oceanography, Ministry of Natural Resources, Xiamen 361005, China.

<sup>3</sup>School of Tourism, Taishan University, Tai'an City, Shandong Province, China, 271000.

**\*Corresponding author:**

Jinpei Yan, Phone: 86-592-2099290, E-mail: [jpyan@tio.org.cn](mailto:jpyan@tio.org.cn)

Address: No. 178 Daxue Road, Siming District, Xiamen City, Fujian Province, China

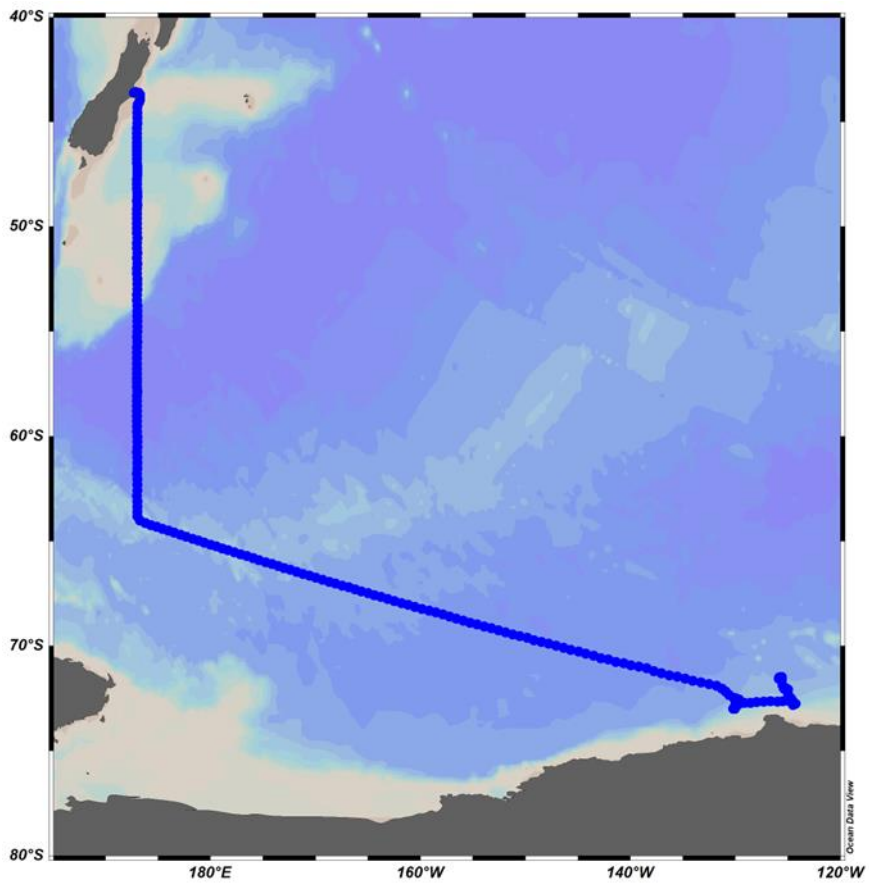

**Fig. S1** The cruise tracks of the observation

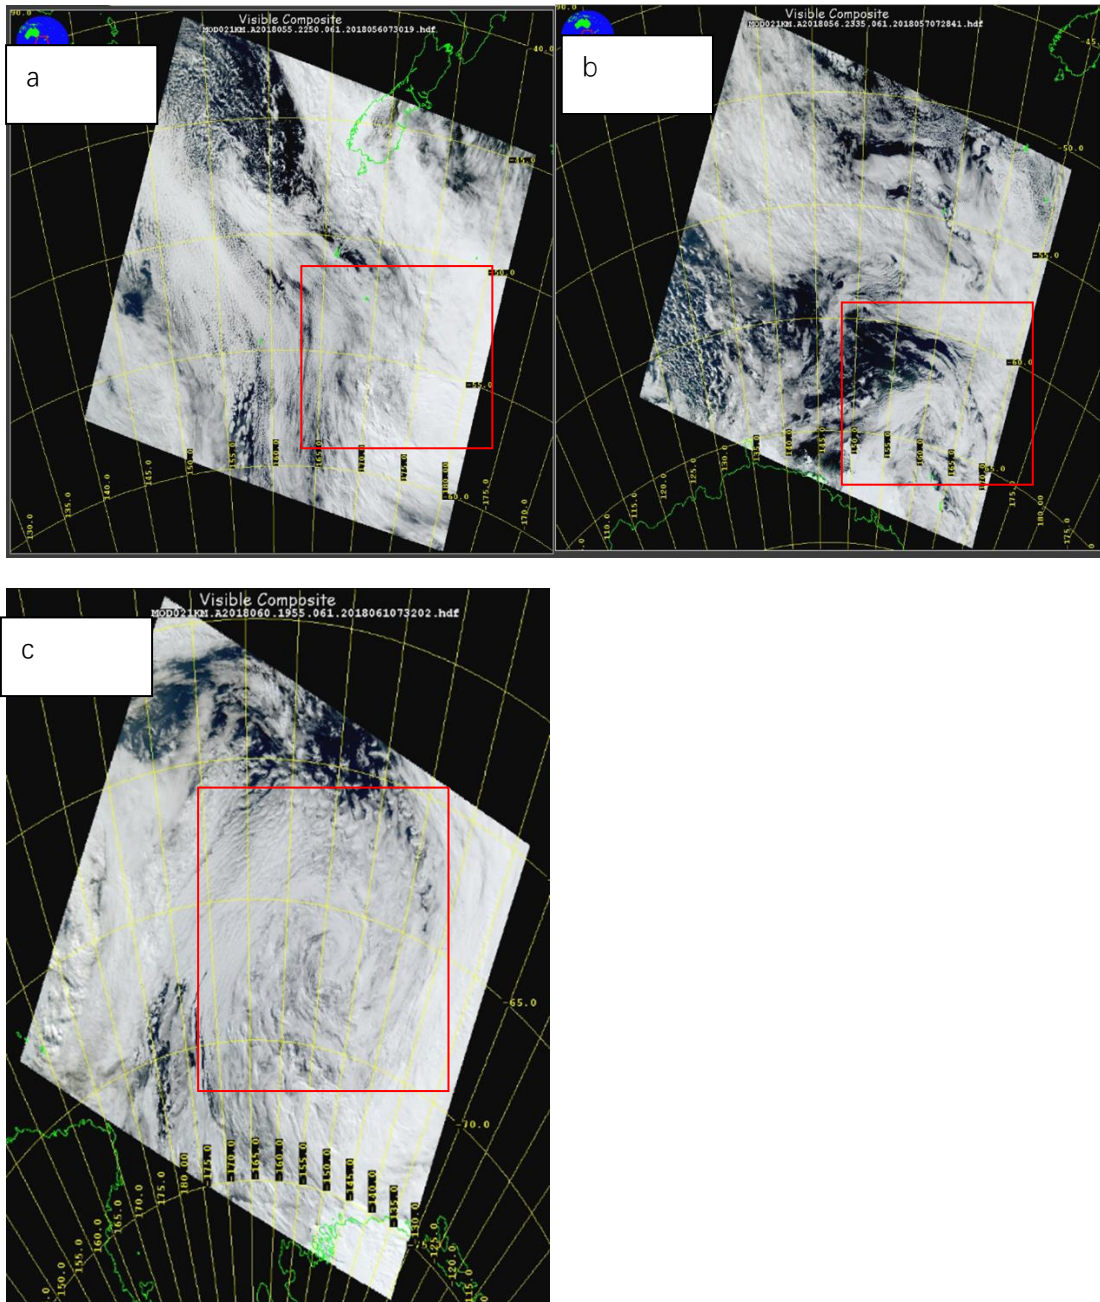

Fig. S2 The satellite cloud map of three events (a) event 1(b) event 2 (c) event 3.

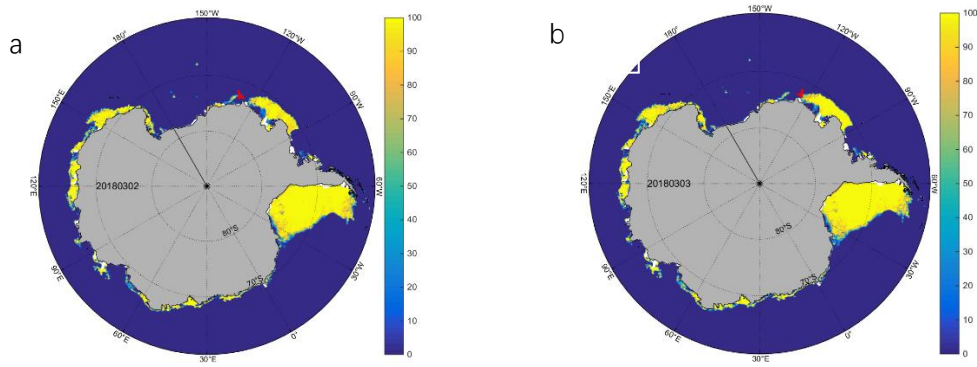

**Fig. S3 Average sea ice concentrations in the Southern Ocean, Antarctica during event 3, (a) 2 March (b) 3 March.**

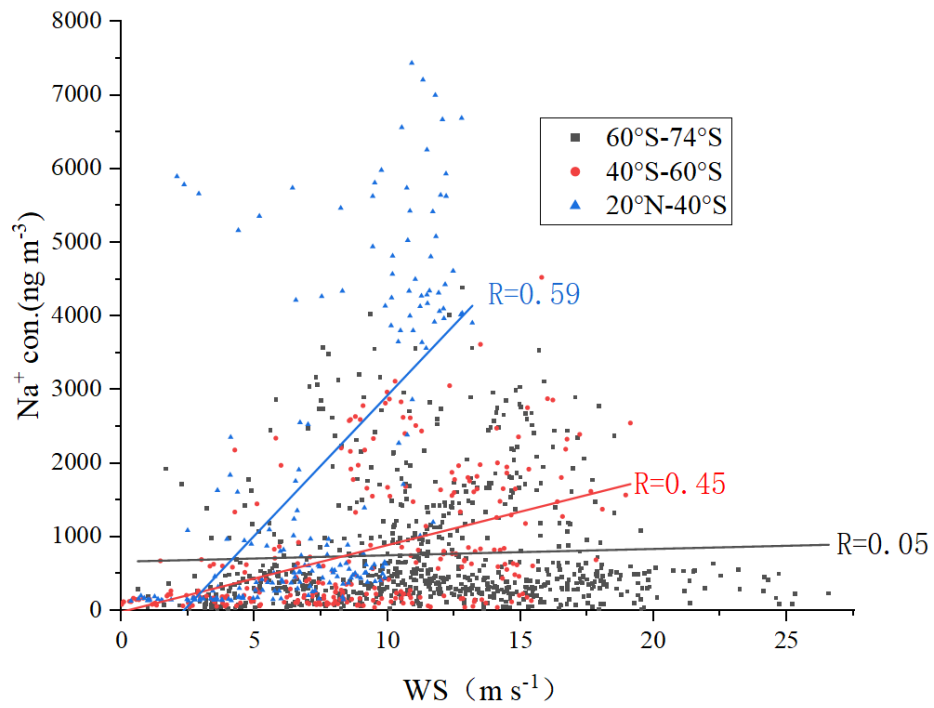

**Fig. S4 Correlation between  $\text{Na}^+$  and wind speed in regions of different latitude.**

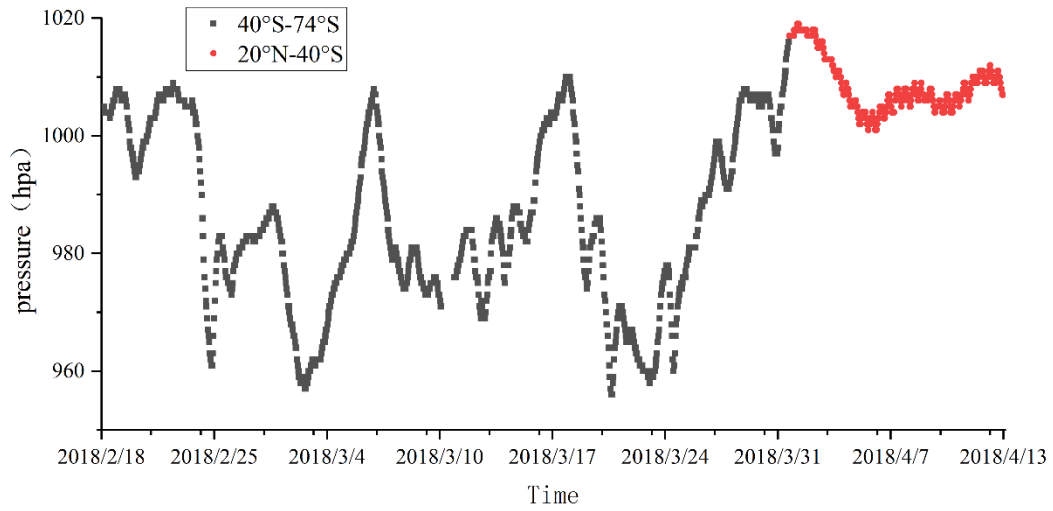

**Fig S5. Temporal distributions of pressure during the cruise.**

|              | Normal | Event1      |         | Event2      |         | Event3      |         |
|--------------|--------|-------------|---------|-------------|---------|-------------|---------|
| Da( $\mu$ m) |        | Non-cyclone | Cyclone | Non-cyclone | Cyclone | Non-cyclone | Cyclone |
| <1           | 16.9%  | 28.9%       | 16.3%   | 10.0%       | 6.2%    | 24.3%       | 19.1%   |
| 1.1-1.2      | 26.1%  | 20.8%       | 22.2%   | 15.8%       | 13.7%   | 19.8%       | 19.6%   |
| 1.3-1.4      | 24.8%  | 21.6%       | 26.9%   | 26.4%       | 25.2%   | 21.7%       | 24.1%   |
| 1.5-1.6      | 17.3%  | 15.2%       | 20.7%   | 23.0%       | 26.9%   | 16.2%       | 20.3%   |
| 1.7-1.8      | 9.0%   | 8.7%        | 10.6%   | 14.4%       | 17.2%   | 10.4%       | 11.2%   |
| 1.9-2.0      | 3.9%   | 3.5%        | 2.7%    | 7.1%        | 7.9%    | 4.9%        | 4.2%    |
| > 2          | 2.1%   | 1.34%       | 0.5%    | 3.3%        | 3.0%    | 2.7%        | 3.1%    |

Table S1 Relative fraction of SSAs size distribution in different case during key events.

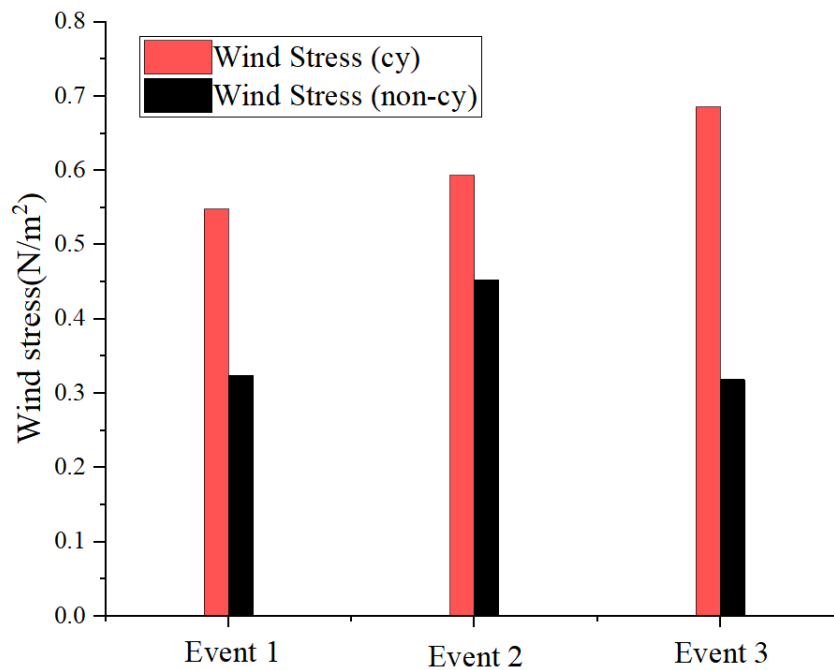

**Fig. S6 the difference of wind stress between cyclonic and non-cyclonic periods**

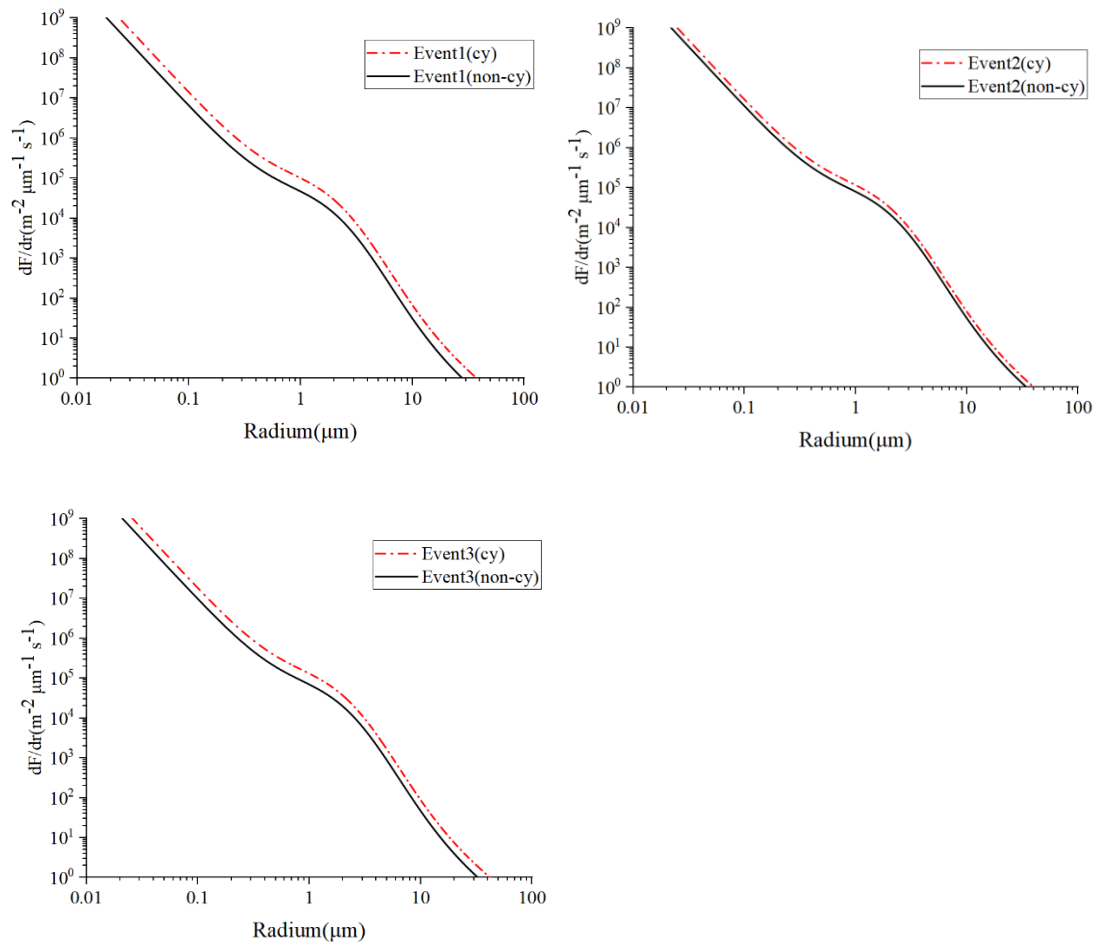

**Fig. S7** The difference of wind stress and Sea-salt flux between cyclonic and non-cyclonic periods
